# Supplementary material
Source: PubMed Central journal article supplement (PMC4373437)
Supplement: jcmm0015-2684-SD1.pdf [file jcmm0015-2684-SD1.pdf]

**Supplemental Tables**Table S1. **PCR primers for human adipogenic and osteogenic specific genes**

| <b>Gene Name</b> | <b>Accession No.</b> | <b>Primer Pairs (5'-3')</b>                                     | <b>Product Size (bp)</b> |
|------------------|----------------------|-----------------------------------------------------------------|--------------------------|
| PPAR $\gamma$    | NM_138712            | Forward: ATAAAGTCCTTCCCGCTGAC<br>Reverse: CTCAAACCTGGGCTCCATAA  | 441                      |
| FABP4            | NM_001442            | Forward: AAGTAGGAGTGGGCTTTG<br>Reverse: AGGTTATGGTGCTCTTGAC     | 192                      |
| RUNX2            | NM_001015051         | Forward: GGAATGCCTCTGCTGTTATG<br>Reverse: GTGGACGAGGCAAGAGTTT   | 426                      |
| Osteocalcin      | NM_199173            | Forward: GCAGCGAGGTAGTGAAGAGA<br>Reverse: CTCCTGAAAGCCGATGTG    | 149                      |
| GAPDH            | NM_002046            | Forward: AACAGCGACACCCACTCCTC<br>Reverse: GGAGGGGAGATTCAGTGTGGT | 258                      |

**Abbreviations:** PPAR $\gamma$ , peroxisome proliferator-activated receptor gamma; FABP4, fatty acid binding protein 4; RUNX2, runt related transcription factor 2; Osteocalcin, gamma-carboxyglutamic acid-containing protein; GAPDH, Glyceraldehyde-3-phosphate dehydrogenase.

Table S2. PCR primers for human genes of Ca<sup>2+</sup> signals and transporters

| Gene Name | Accession No. | Primer Pairs (5'-3')                                              | Product Size (bp) |
|-----------|---------------|-------------------------------------------------------------------|-------------------|
| IP3R1     | NM_002222     | Forward: TGACGAGAACCTGCCCTAT<br>Reverse: TCCTTCGCCATCTTGCT        | 430               |
| IP3R2     | NM_002223     | Forward: GCAATCGTGTCTGTTCCA<br>Reverse: TCTTCAAGTCTCAGCATCG       | 332               |
| IP3R3     | NM_002224     | Forward: GCCTACTATGAGAACCACACG<br>Reverse: CAGAAGAGCAATGAGATGAGAG | 389               |
| RyR1      | NM_000540     | Forward: TGACTACCATCAGCACGACA<br>Reverse: ACGAAGACGGCAGGAAATA     | 297               |
| RYR2      | NM_001035     | Forward: TTTACCAGCACCCCTAATCTC<br>Reverse: CAGCCAAATAACGAACTACC   | 348               |
| RYR3      | NM_001036     | Forward: TCTGCTGTCTGGGTCTATCTC<br>Reverse: CCAAATGTCTTATGCGTCAC   | 262               |
| SERCA1    | NM_004320     | Forward: GTGATCCGCCAGCTAATG<br>Reverse: CGAATGTCAGGTCCGTCT        | 361               |
| SERCA2    | NM_001681     | Forward: CGCTACCTCATCTCGTCCA<br>Reverse: TCGGGTATGGGGATTCAA       | 406               |
| SERCA3    | NM_174958     | Forward: GATGGAGTGAACGACGCA<br>Reverse: CCAGGTATCGGAAGAAGAG       | 409               |
| NCX1      | BC098308      | Forward: GTCGCACTTGGAACATCA<br>Reverse: CCAGGGAGGAGAAGAAAA        | 373               |
| NCX2      | NM_015063     | Forward: CGGTGGATAAACTCATCAAGAA<br>Reverse: CAGGGCAACGAAGACAACA   | 359               |
| NCX3      | NM_182936     | Forward: GAGATGGGAAAGCCAGTAT<br>Reverse: ATGCCACGAAAACAACAG       | 430               |
| PMCA1     | NM_001682     | Forward: GCTGGAGGTGAAGAGGAA<br>Reverse: GCACTGCGACCACTAAAA        | 418               |
| PMCA2     | NM_001683     | Forward: ACGGATGTTGGTACTGC<br>Reverse: CACGGACTTCTCCTTCTTGT       | 214               |
| PMCA3     | NM_021949     | Forward: TGGTCCTCTACTTTGTGATTG<br>Reverse: TGGTGGTATAGGCACTGTTG   | 417               |
| PMCA4     | NM_001684     | Forward: CTGTGCGTAATGAAGTGC<br>Reverse: AGTCCCGGTAAGCTATG         | 279               |

**Abbreviations:** IP3R: inositol 1, 4, 5-trisphosphate receptor; RyR: ryanodine receptor; SERCA: sarco/endoplasmic reticulum Ca<sup>2+</sup> ATPase; NCX: Na<sup>+</sup>-Ca<sup>2+</sup> exchanger; PMCA: plasma membrane Ca<sup>2+</sup> ATPase.

Table S3. PCR primers for human specific genes related to cADP ribose

| Gene name | Accession No. | Primer Pairs (5'-3')                                                 | Product Size (bp) |
|-----------|---------------|----------------------------------------------------------------------|-------------------|
| CD38      | NM_001775     | Forward: CTGTCTTGGCGTCAGTATCC<br>Reverse: TAGCCTAGCAGCGTGTCCCT       | 383               |
| BST-1     | NM_004334     | Forward: ACACTTGCGGGACATCTT<br>Reverse: TAGGCTCCTGTTGGCTCT           | 477               |
| Cx43      | NM_000165     | Forward: CAGTCTGCCTTTCGTTGT<br>Reverse: AAGATGGTTTTCTCCGTG           | 482               |
| ENT1      | NM_004955     | Forward: GTGCCTTCGGCTACTTTAT<br>Reverse: CGATGCTGGACTTGACCT          | 345               |
| ENT2      | NM_001532     | Forward: TGGGGTACTTTATCACGC<br>Reverse: CTGGGGACTACTGGGAAT           | 185               |
| CNT1      | NM_004213     | Forward: GCCTGTAGCCTTCTTGATG<br>Reverse: CTGAACTCTGGATTGACGC         | 486               |
| CNT2      | NM_004212     | Forward: CTGGAGGACAGTGTTTTTCG<br>Reverse: CAGTGGTGCCCATAGTGAT        | 305               |
| CNT3      | NM_022127     | Forward: ATAATCGCCACTTACGCT<br>Reverse: TTCCTCCTGGGATGACTT           | 331               |
| TPRM2-S   | NM_001001188  | Forward: GTGCGAGGAGATGCGGCAGTAG<br>Reverse: CAGGATGTTGGTGAAGAGCAGGTA | 602               |
| TPRM2-L   | NM_003307     | Forward: TCGGACCCAACCACACGCTGTA<br>Reverse: CGTCATTCTGGTCCTGGAAGTG   | 339               |

**Abbreviations:** BST-1: bone marrow stroma antigen-1; CNT: concentrative nucleoside transporter; ENT: equilibrative nucleoside transporter; Cx43: connexin 43; TRPM2-S: short form of TRPM2; TRPM2-L: full-length isoform of TRPM2; GAPDH: Glyceraldehyde-3-phosphate dehydrogenase.

Table S4. **SiRNA sequences of TRPM2 (NM\_003307)**

| <b>ID</b> | <b>SiRNA sequence (5'-&gt;3')</b>                                                | <b>Target exon</b> |
|-----------|----------------------------------------------------------------------------------|--------------------|
| A         | <b>Sense:</b> GUGAAAAAGUACGGUCCGAtt<br><b>Antisense:</b> UCGGACGUACUUUUUCACctt   | 1                  |
| B         | <b>Sense:</b> GGCUGGAGAAGUUCAUAUAUCtt<br><b>Antisense:</b> GAUAUGAACUUCUCCAGCCtg | 4                  |
| C         | <b>Sense:</b> GGAAGAGCAUAAAGAAGAUtt<br><b>Antisense:</b> AUCUUCUUUAUGCUCUUCctg   | 25                 |

Table S5 **Flow cytometry mark results-human bone marrow MSCs**

| Panel No | Antibody       | Expected Result on MSCs | Whole Bone Marrow (% Gated) | 240L P2 (% Gated) |
|----------|----------------|-------------------------|-----------------------------|-------------------|
| <b>1</b> | CD34 PE        | Neg                     | 1.2                         | 0.08              |
|          | CD36 FITC      | Neg                     | 19.5                        | 0.25              |
|          | CD45 ECD       | Neg                     | 95.8                        | 0.18              |
|          | CD117 PC5      | Neg                     | 2.6                         | 0.62              |
| <b>2</b> | CD44 FITC      | >Importnt Pos           | 93.3                        | 88.78             |
|          | CD90 PC5       | >Importnt Pos           | 2.1                         | 99.85             |
|          | CD166 PE       | >Importnt Pos           | 0.7                         | 98.68             |
| <b>3</b> | CD49b FITC     | >Importnt Pos           | 3.6                         | 1.63              |
|          | CD105 PE       | >Importnt Pos           | 0.8                         | 98.86             |
| <b>4</b> | CD29 PC5       | < Importnt Pos          | 43.1                        | 99.81             |
|          | CD49c PE       | <Importnt Pos           | 0.2                         | 99.32             |
|          | CD147 FITC     | < Importnt Pos          | 46.9                        | 99.23             |
| <b>5</b> | CD59 FITC      | <Importnt Pos           | 45.9                        | 99.50             |
|          | CD184 PE       | Dim on MSCs             | 20.4                        | 0.36              |
| <b>6</b> | CD49f PC5      | Dim on MSCs             | 0.2                         | 12.76             |
|          | CD 106 PE      | Dim on MSCs             | 3.1                         | 0.76              |
|          | HLA-1:ABC FITC | Dim on MSCs             | 94.6                        | 99.46             |

## Supplemental figures

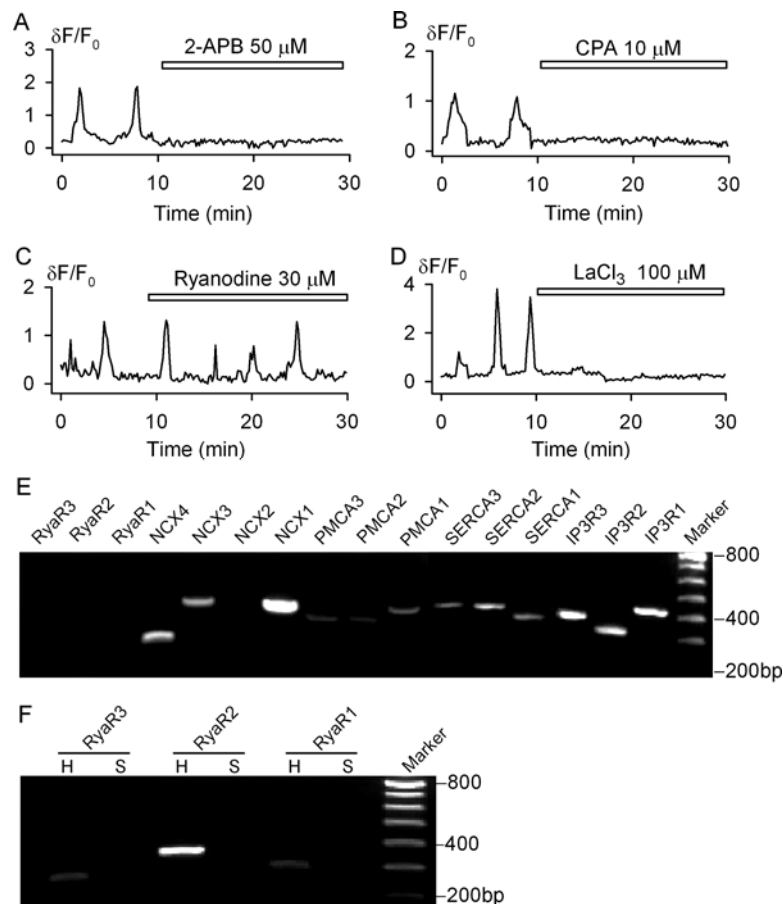

Figure S1.  $\text{Ca}^{2+}$  signaling pathways in human MSCs.

**A.** The IP3Rs blocker 2-APB suppressed spontaneous  $\text{Ca}^{2+}_i$  oscillations (n=27). **B.** SERCAs inhibitor CPA abolished  $\text{Ca}^{2+}_i$  oscillations (n=27). **C.** RyRs blocker showed no significant effect on  $\text{Ca}^{2+}_i$  oscillations (n=24). **D.**  $\text{LaCl}_3$ , a SOC entry blocker blocked  $\text{Ca}^{2+}_i$  oscillations (n=25). **E.** RT-PCR results show significant mRNAs for IP3R1-3, SERCA1-3, PMCA1-3, NCX1, NCX3 and NCX4, but not for RyRs. **F.** Messenger RNAs for RyR1-3 were detectible human SH-SY5Y neuroblastoma cells (H), but not in stem cells (S) using three primers of RyRs in E.

**Abbreviations:** IP3R: IP3 receptor; SERCA: sarco/endoplasmic reticulum  $\text{Ca}^{2+}$ -ATPase; PMCA: plasma membrane  $\text{Ca}^{2+}$ -ATPase. NCX:  $\text{Na}^+$ - $\text{Ca}^{2+}$  exchanger; RyR: ryanodine receptor; H: total RNA extracted from human SH-SY5Y neuroblastoma cells; S: human mesenchymal stem cells.

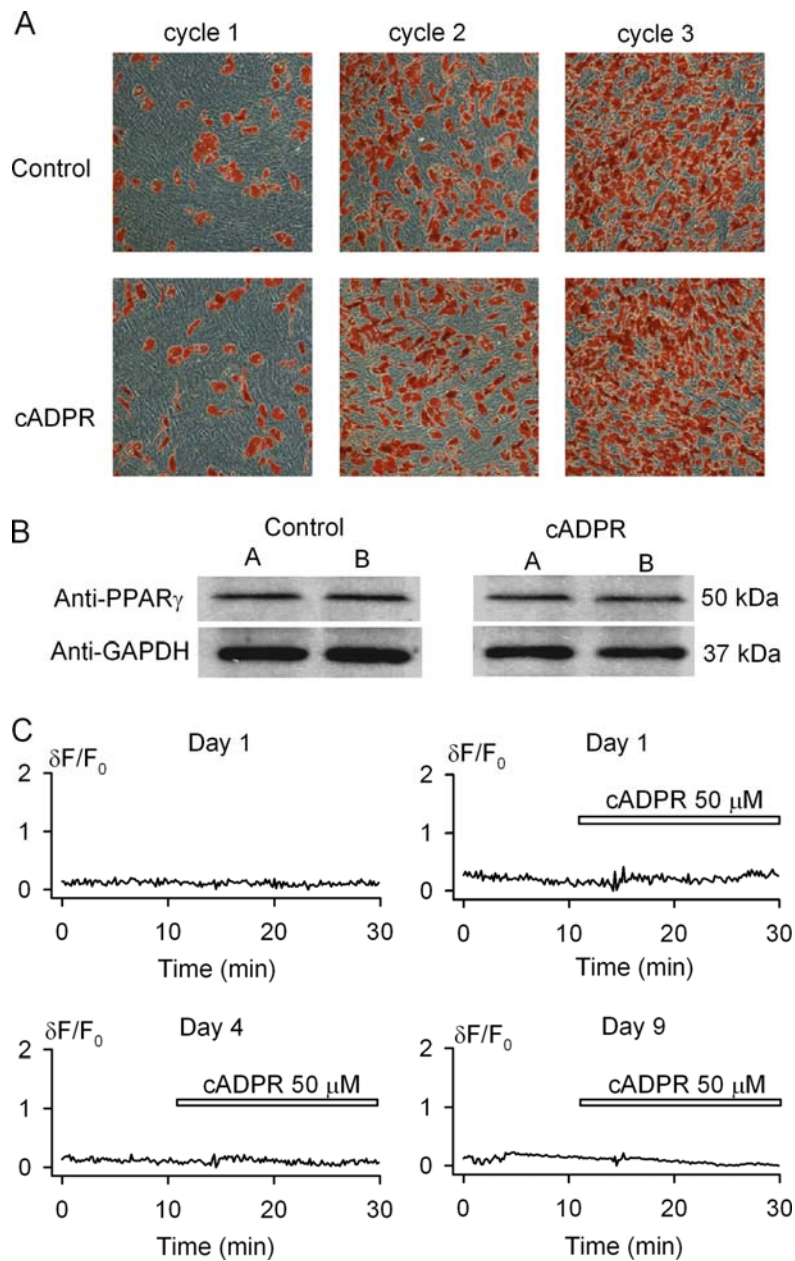

Figure S2. **Effects of cADP ribose on adipogenesis in human MSCs.**

**A.** Images showing adipogenic differentiation of human MSCs at induction cycle 1, 2 and 3. cADP-ribose showed no significant effect on adipogenesis in human MSCs. Similar results were obtained in a total of 3 experiments. **B.** No difference was found in PPAR $\gamma$  protein expression in the differentiated adipocytes (day 9) with and without the treatment of 50  $\mu$ M cADPR. **C.** No spontaneous Ca $^{2+}_i$  oscillations were observed during adipogenesis on day 1, day 4 and day 9. cADP-ribose did not initiate Ca $^{2+}_i$  transient or Ca $^{2+}_i$  oscillations in these cells (n=32 for each).

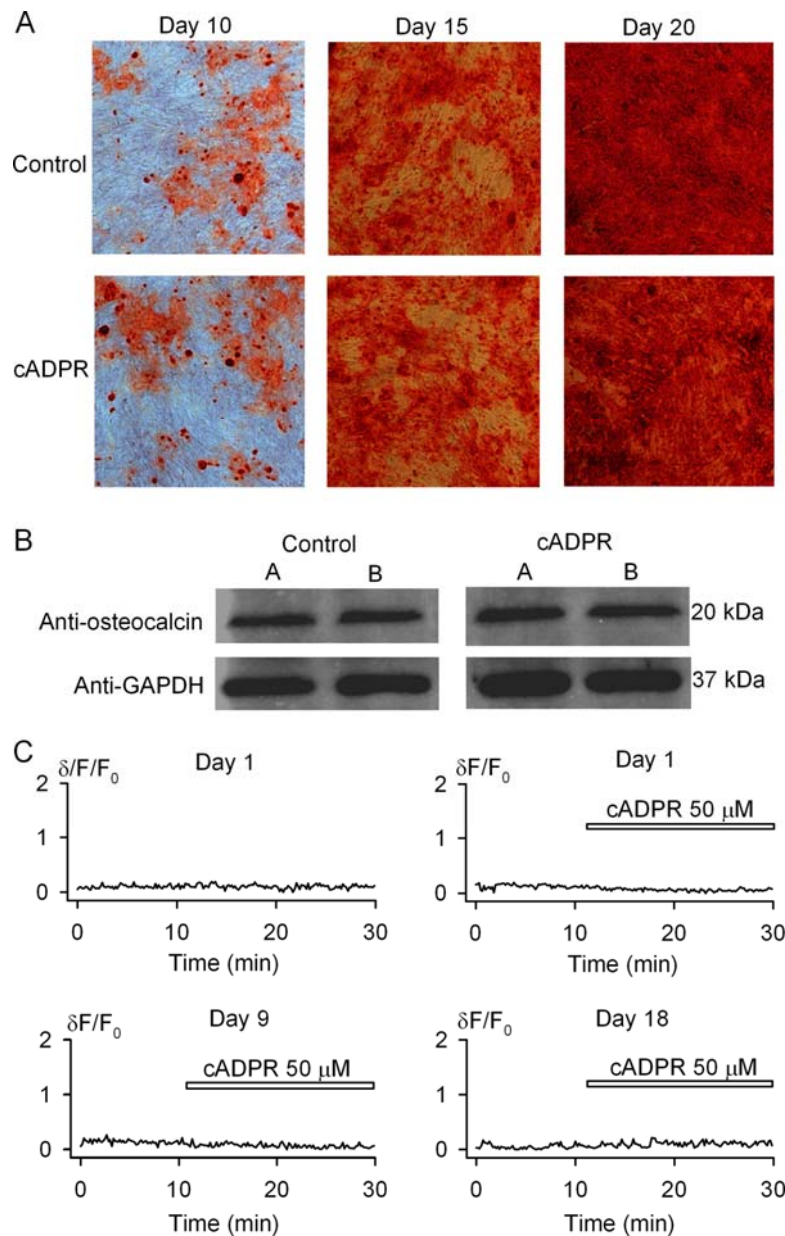

Figure S3. **Effects of cADP ribose on osteogenesis in human MSCs.**

**A.** Images showing the osteogenesis on day 10, day 15 and day 20 by Alizarin red S staining. cADP ribose had no significant effect on osteogenesis in human MSCs. Similar results were obtained in a total of 3 experiments. **B.** No difference was found in osteocalcin protein expression in the differentiated osteocytes (day 18) with and without the treatment of 50  $\mu$ M cADPR. **C.** No spontaneous  $\text{Ca}^{2+}_i$  oscillations were observed during osteogenesis on day 1, day 9 and day 18. Cyclic ADP ribose did not initiate  $\text{Ca}^{2+}_i$  transient or  $\text{Ca}^{2+}_i$  oscillations in these cells (n=32 for each).
